# Supplementary material for: Investigating the hydrolysis of cryogenically layered molybdenum hexafluoride through a disordered hydrogen-bonded network
Source: Royal Society of Chemistry journal article supplement (doi:10.1039/d2cp04147b), 2022-12-22
Supplement: d2cp04147b1.pdf [file d2cp04147b1.pdf]

## Supporting Information

### Investigating the Hydrolysis of Cryogenically Layered Molybdenum Hexafluoride Through a Disordered Hydrogen-Bonded Network

Louis McNamara, Abigail Waldron, Michael Thomas, Willls Jones, Patrick O'Rourke, Darrell Simmons, and K. Alicia Strange Fessler

#### Table of Contents

|                                                                                             |   |
|---------------------------------------------------------------------------------------------|---|
| Figure S1 Comparison of MoF <sub>6</sub> and MoF <sub>6</sub> water layer experiments. .... | 2 |
| Figure S2 Water calibration curve from layering air. ....                                   | 3 |
| Figure S3 MoF <sub>6</sub> calibration curve from layering pure MoF <sub>6</sub> . ....     | 4 |
| Figure S4 Calibrated gas manifold layout. ....                                              | 5 |
| Table S1 Calibrated volumes of gas cyclinders and lines. ....                               | 5 |

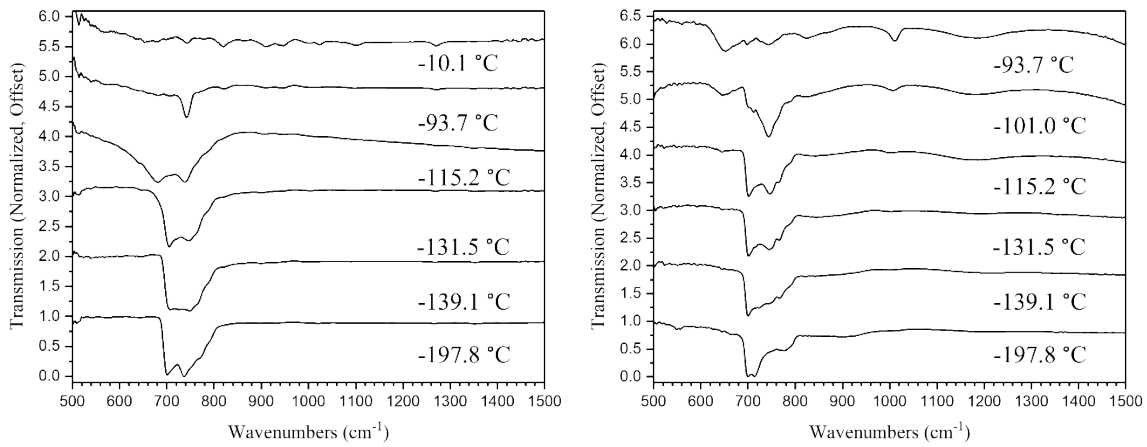

Figure S1 Comparison of MoF<sub>6</sub> and MoF<sub>6</sub> water layer experiments. On the left, pure MoF<sub>6</sub> and on the right, MoF<sub>6</sub> and air sequentially layered.

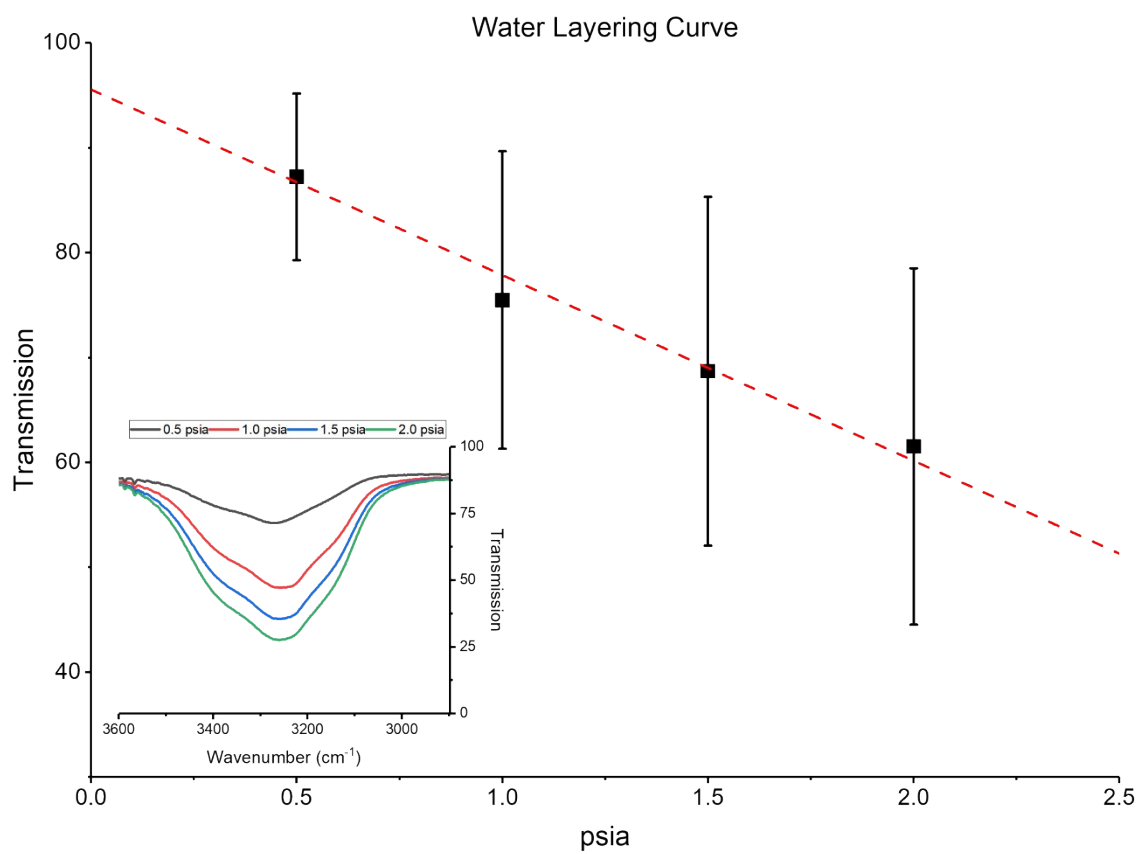

Figure S2 Water calibration curve and infrared spectra from layering air.

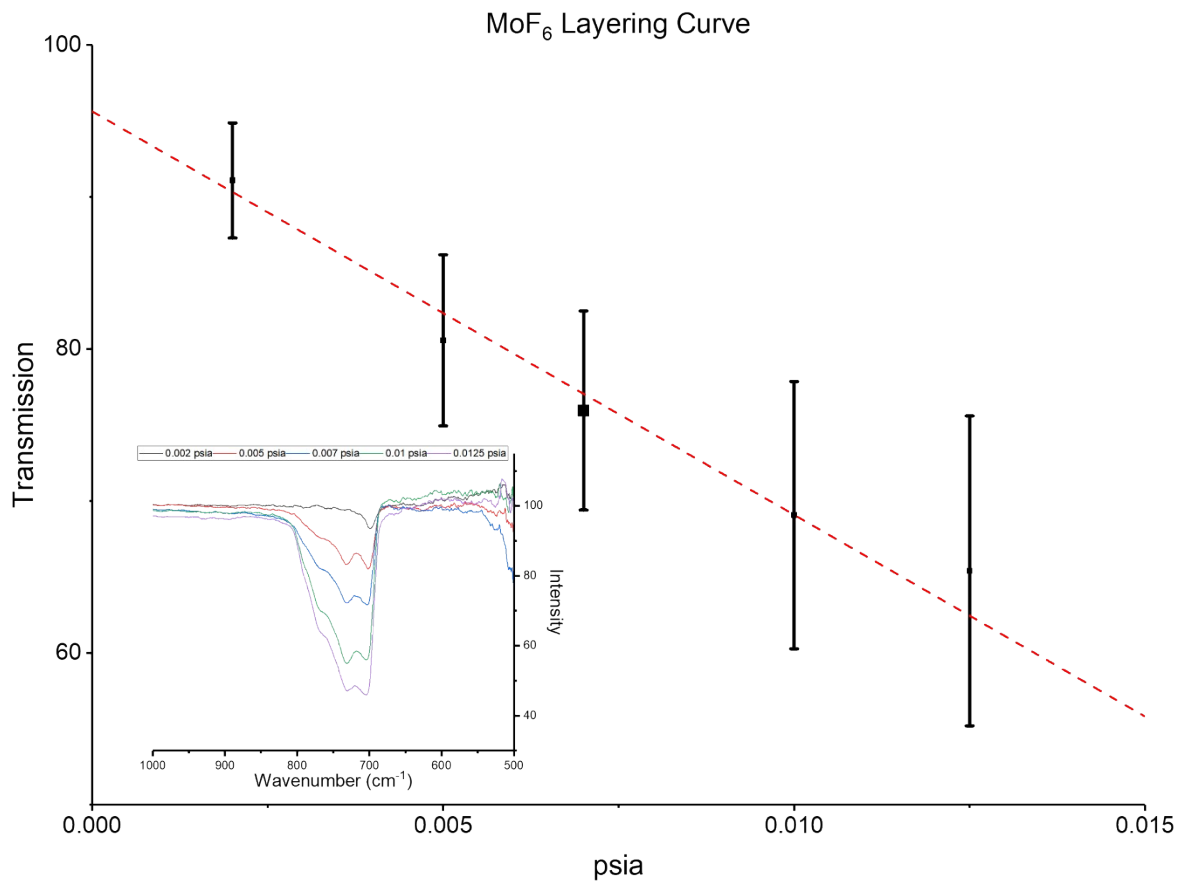

Figure S3 MoF<sub>6</sub> calibration curve and infrared spectra from layering pure MoF<sub>6</sub>.

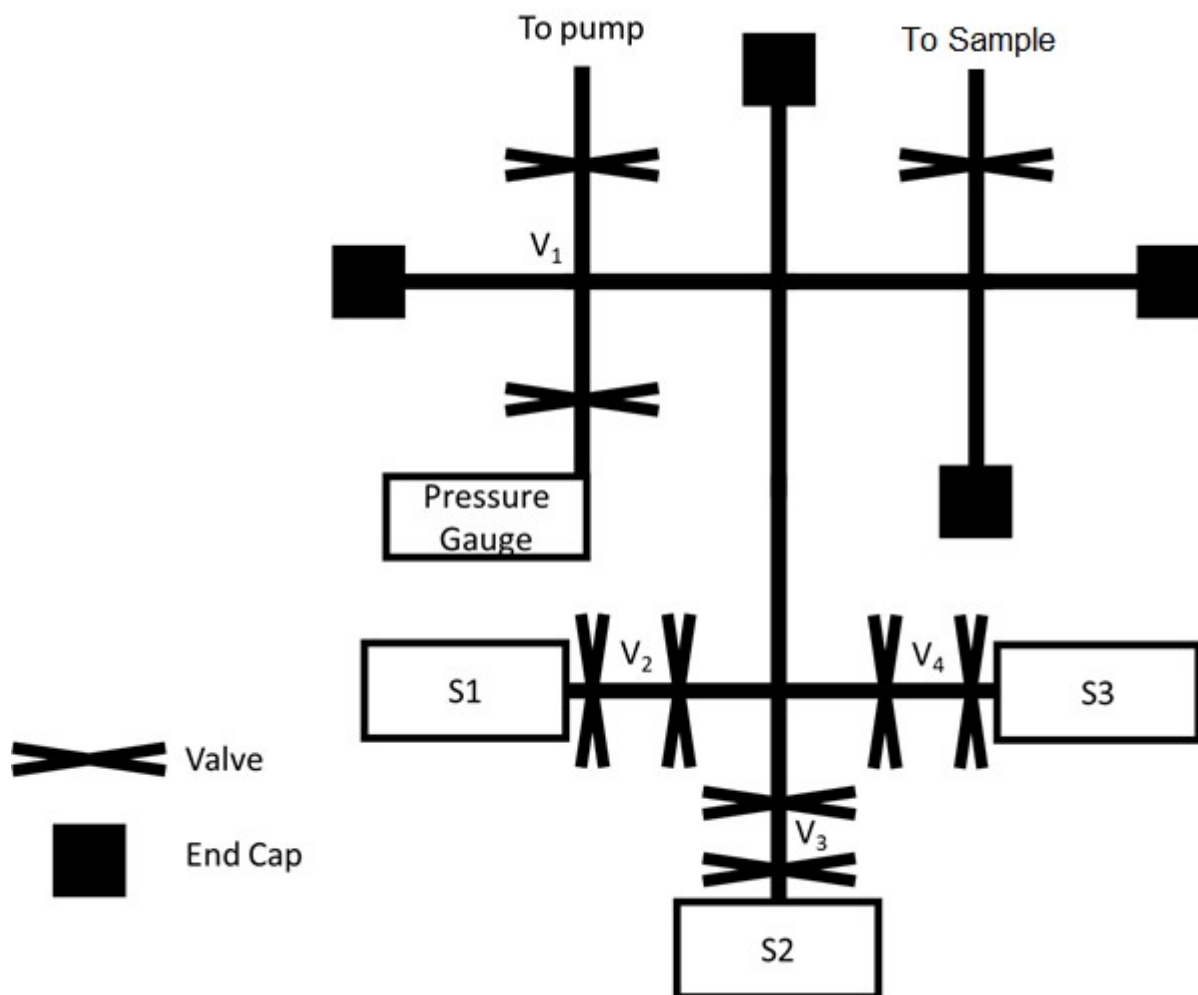

Figure S4 Schematic of calibrated gas manifold. S1- S3 represent empty gas cylinders with calibrated volumes. V1-V4 are the volumes of the manifold and lines connecting to the gas cylinders.

Table S1 Calibrated volumes of manifold gas cylinders and lines.

| Volume Identifier         | Volume Label | Average (mL) | StDev (mL) | %RSD |
|---------------------------|--------------|--------------|------------|------|
| Manifold and T connection | V1           | 58.81        | 0.02       | 0.03 |
| Line to cylinder 1        | V2           | 53.49        | 0.02       | 0.04 |
| Cylinder 1                | S1           | 473.4        | 0.8        | 0.2  |
| Line to cylinder 2        | V3           | 34.24        | 0.06       | 0.2  |
| Cylinder 2                | S2           | 481.4        | 0.9        | 0.2  |
| Line to cylinder 3        | V4           | 54.3         | 0.1        | 0.2  |
| Cylinder 3                | S3           | 471.1        | 0.8        | 0.2  |
